# Supplementary material
Source: publisher figshare collection journal article supplement (https://acs.figshare.com/ndownloader/files/4281994)
Supplement: Supplementary file 1 [file 4281994]

## Supporting Information

Optimized Unlike-pair Interactions for Water-Carbon Dioxide Mixtures  
described by the SPC/E and EPM2 Model (Lukas Vlcek, Ariel A. Chialvo,  
and David R. Cole)

Alternative derivation of the polarization contribution to the solubility of  
SPC/E water in a carbon dioxide-rich phase

Here we consider the condition of equilibrium for the water species in a two  
phases equilibrium system, *i.e.*, a carbon dioxide-rich water phase in liquid-liquid  
equilibrium with the corresponding water-rich carbon dioxide phase,

$$\mu_W^C(PTx_W^C) = \mu_W^W(PTx_W^W) \quad \text{SI-1}$$

where the superscripts <sup>C</sup> and <sup>W</sup> identify the carbon dioxide-rich and water-rich phases,  
respectively. This condition of equilibrium can be rewritten in terms of the so-called  
pseudo-chemical potentials  $\mu_W^{*\beta}(PTx_W^\beta)$  in the following equivalent form <sup>1</sup>,

$$\begin{aligned} \mu_W^{*C}(PTx_W^C) - \mu_W^{*W}(PTx_W^W) &= \Delta G_W^{*C} - \Delta G_W^{*W} \\ &= kT \ln \left[ \rho_W^W / \rho_W^C \right]_{pe} \end{aligned} \quad \text{SI-2}$$

where  $\Delta G_W^{*\beta} = \left[ \mu_W^{*\beta}(PTx_W^\beta) - \mu_W^{*IG}(T) \right]$  is the solvation Gibbs free energy for the water  
species in the liquid phase  $\beta$  (either W or C),  $\rho_W^\beta$  is the equilibrium density of water in  
phase  $\beta$ , and subscript *pe* denotes phase equilibrium. The microscopic interpretation is  
given by the following statistical mechanics expression <sup>1</sup>,

$$\Delta G_W^{*\beta} = -kT \ln \left\langle \exp(-B_W/kT) \right\rangle \quad \text{SI-3}$$

which relates the binding energy  $B_W$  between the molecule of species “W” and the surrounding system, where the angle brackets denote an ensemble average over all possible system configurations.

While Eqns. SI-2 and SI-3 are completely general expressions; their application to the system of current interest, *i.e.*, the solvation of water in the carbon dioxide-rich phase when water is described by the SPC/E model requires some additional analysis. By invoking the following approximation for the free energy of solvation of water as a fixed-charge non-polarizable model <sup>2</sup>, *i.e.*,

$$\begin{aligned}\Delta G_W^{*C} &\cong \mu_{W,SPC/E}^{*C}(PTx_{W,SPC/E}^C) - \mu_W^{*IG}(T) - W_{W,pol} \\ &= \Delta G_{W,SPC/E}^{*C} - W_{W,pol}\end{aligned}\tag{SI-4}$$

then,

$$\begin{aligned}W_{W,pol} &= [\Delta G_{W,FC}^{*C} - \Delta G_{wat}^{*W}] - [\Delta G_W^{*C} - \Delta G_W^{*W}] \\ &= kT \ln \left[ \rho_W^W / \rho_{W,SPC/E}^C \right]_{pe} - kT \ln \left[ \rho_W^W / \rho_W^C \right]_{pe} \\ &= kT \ln \left[ \rho_W^C / \rho_{W,SPC/E}^C \right]_{pe} \cong kT \ln \left[ x_W^C / x_{W,SPC/E}^C \right]_{pe}\end{aligned}\tag{SI-5}$$

where we have invoked the accurate approximation  $\rho_W^C \cong x_W^C \rho_C^C$  for a highly dilute water solute in a carbon dioxide-rich phase. Note that SI-4 might be obtained from SI-3 by assuming that the binding energy  $B_W \cong B_{W,SPC/E} - \Delta B_{W,pol}$  so that,

$$\begin{aligned}
\Delta G_W^{*\beta} &= -kT \ln \left\langle \exp \left( - \left[ B_{W,SPC/E} - \Delta B_{W,pol} \right] / kT \right) \right\rangle \\
&= -kT \ln \left\langle \exp \left( - B_{W,SPC/E} / kT \right) \right\rangle - kT \ln \left\langle \exp \left( \Delta B_{W,pol} / kT \right) \right\rangle \quad \text{SI-6} \\
&= \Delta G_{W,SPC/E}^{*\beta} - W_{W,pol}
\end{aligned}$$

For SPC/E we have that  $\Delta H_{pol}^{SPC/E} = 0.5 \left( \vec{\mu}_W^{SPC/E} - \vec{\mu}_W^{vac} \right)^2 / \alpha_m$ , where  $\Delta H_{pol}^{SPC/E}$  is the change of enthalpy involved in the polarization of an isolated water molecule to increase its original permanent dipole moment  $|\vec{\mu}_W^{vac}| = 1.85D$  to that of the SPC/E water molecule,  $|\vec{\mu}_W^{SPC/E}| = 2.35D$ , and  $\alpha_m$  is the molecular polarizability of water (see schematic Figure 1a). Consequently, from SI-5 we can estimate the effect of the ‘over-polarized’ solute water on the water solubility in the carbon dioxide-rich phase as follows,

$$\left[ x_W^C / x_{W,SPC/E}^C \right]_{pe} = \exp \left( \Delta H_{pol}^{SPC/E} / kT \right) \quad \text{SI-7}$$

where  $x_W^C$  is the corrected solubility (mole fraction) of the water in the carbon dioxide-rich phase (C), while  $x_{W,SPC/E}^C$  is the corresponding uncorrected solubility directly obtained from the Gibbs Ensemble Monte Carlo simulation.

The polarization correction SI-6 was first included in Hermans *et al.*’s estimation of the solvation free energy of water models<sup>3</sup>, resulting in a satisfactory prediction by the SPC/E model. On the other hand, disregarding this correction led to the exclusion of the SPC/E model for a more detailed study of the vapor-liquid equilibria of the CO<sub>2</sub>/H<sub>2</sub>O mixture by Gibbs ensemble Monte Carlo simulations<sup>4</sup>.

#### REFERENCES:

- (1) Ben-Naim, A. *Solvation Thermodynamics*; Plenum Press: New York, 1987.
- (2) Swope, W. C.; Horn, H. W.; Rice, J. E. *Journal of Physical Chemistry B* **2010**, *114*, 8631.

(3) Hermans, J.; Pathiaseril, A.; Anderson, A. *Journal of the American Chemical Society* **1988**, *110*, 5982.

(4) Vorholz, J.; Harismiadis, V. I.; Rumpf, B.; Panagiotopoulos, A. Z.; Maurer, G. *Fluid Phase Equilibria* **2000**, *170*, 203.
